# Supplementary material
Source: MDPI journal article supplement (https://www.mdpi.com/2073-4352/9/1/45)
Supplement: s1 [file s1]

## Supporting Information

for

# Modification of structure and magnetic properties in coordination assemblies based on $[\text{Cu}(\text{cyclam})]^{2+}$ and $[\text{W}(\text{CN})_8]^{3-}$

Aleksandra Pacanowska, Mateusz Reczyński and Beata Nowicka \*

### Contents:

**Figure S1.** PXRD pattern for the rehydrated sample of **1** in comparison to **1·5H<sub>2</sub>O** and **1**.

**Figure S2.** Mass loss upon dehydration of **1·5H<sub>2</sub>O** monitored by dynamic vapour sorption method.

**Figure S3.** PXRD pattern for sample obtained from  $[\text{Cu}(\text{cyclam})](\text{NO}_3)_2$  and  $\text{Na}_3[\text{W}(\text{CN})_8]$  by quick precipitation from water solution in comparison to **1·5H<sub>2</sub>O** and **2·3H<sub>2</sub>O**.

**Table S1.** Continuous shape measure parameters for octa-coordinated W centres in the structures of **1·5H<sub>2</sub>O**, **1** and **2·3H<sub>2</sub>O**; SAPR-8 = square antiprism, TDD-8 = triangular dodecahedron, BTR-8 = biaugmented trigonal prism.

**Table S2.** Continuous shape measure parameters for hexa-coordinated Cu centres of **1·5H<sub>2</sub>O**, **1** and **2·3H<sub>2</sub>O**; OC- 6=octahedron.

**Figure S4.** Inter- and intra-chain H-bonds in **1**.

**Figure S5.** Inter- and intra-molecular H-bonds in **2·3H<sub>2</sub>O**; symmetrically independent molecules marked pink and violet.

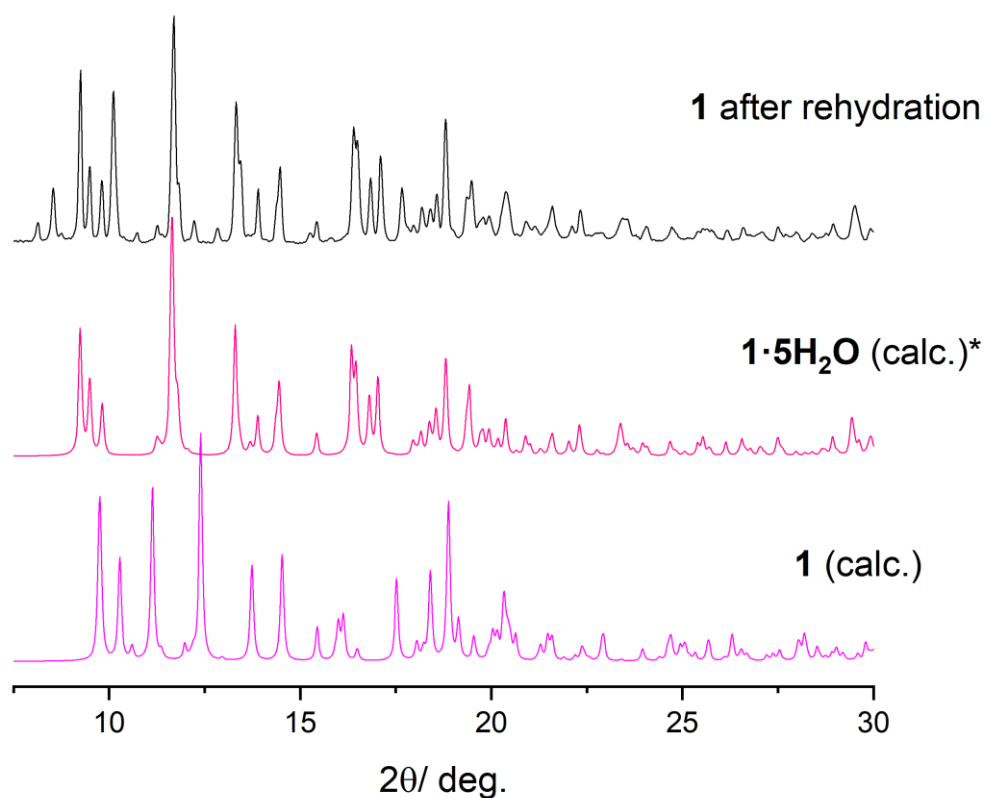

**Figure S1.** PXRD pattern for the rehydrated sample of **1** in comparison to **1·5H<sub>2</sub>O** and **1**.

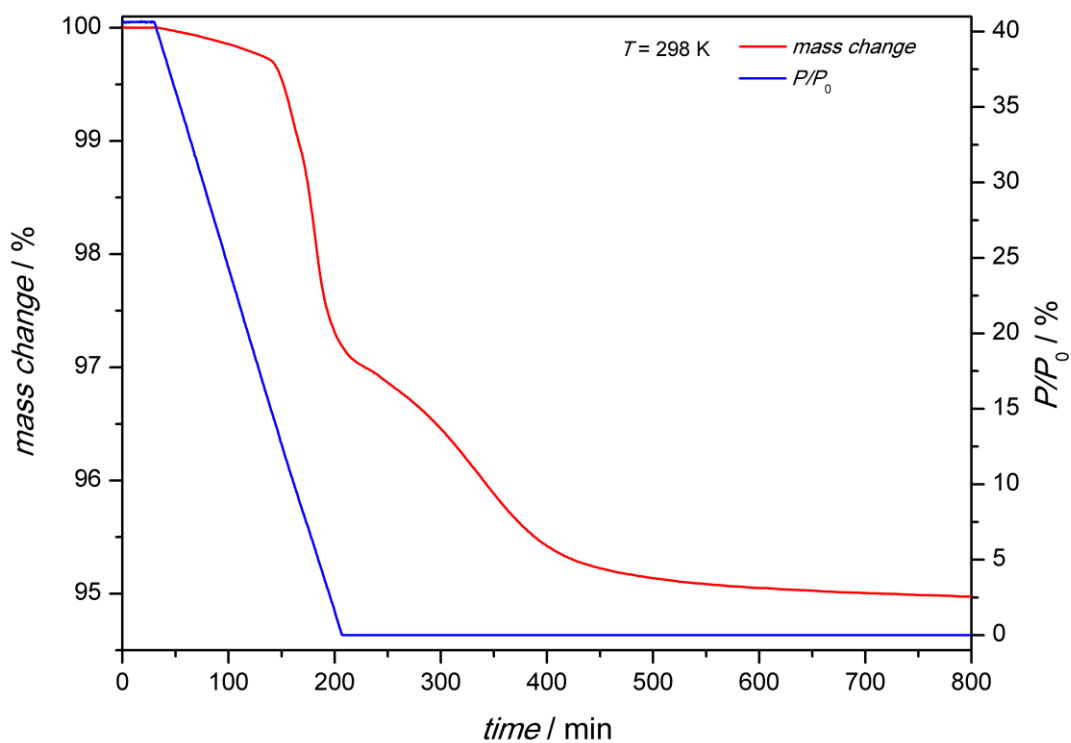

**Figure S2.** Mass loss upon dehydration of **1·5H<sub>2</sub>O** monitored by dynamic vapour sorption method.

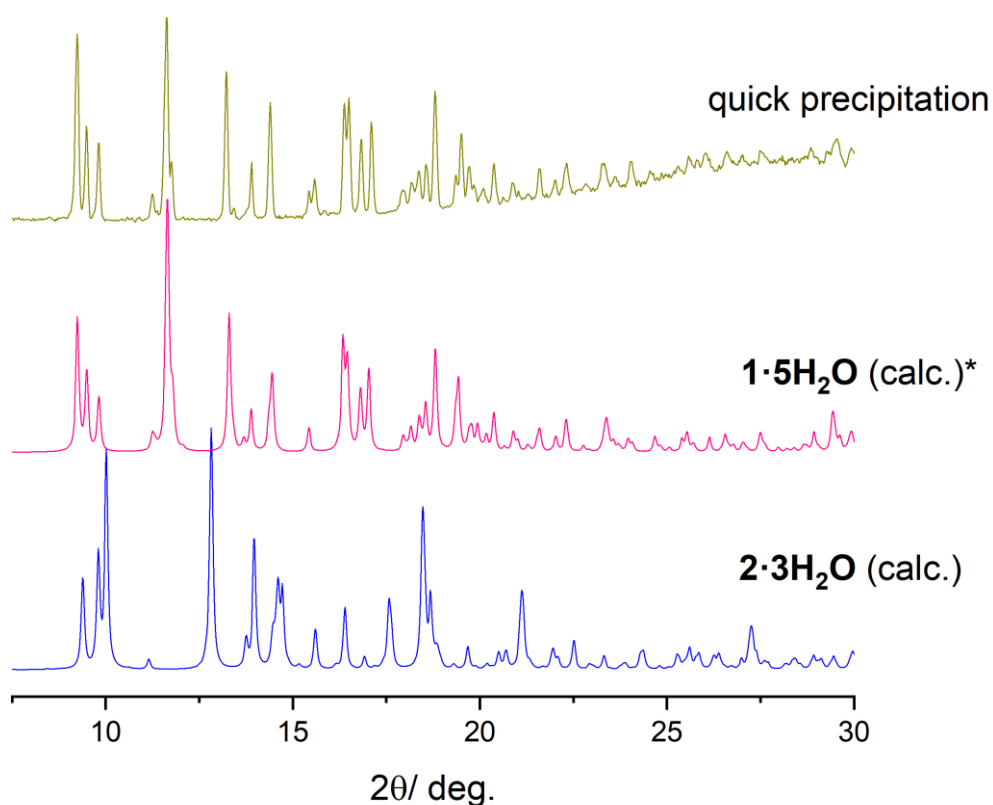

**Figure S3.** PXRD pattern for sample obtained from  $[\text{Cu}(\text{cyclam})](\text{NO}_3)_2$  and  $\text{Na}_3[\text{W}(\text{CN})_8]$  by quick precipitation from water solution in comparison to  $1\cdot 5\text{H}_2\text{O}$  and  $2\cdot 3\text{H}_2\text{O}$ .

**Table S1.** Continuous shape measure parameters for octa-coordinated W centres in the structures of  $1\cdot 5\text{H}_2\text{O}$ , **1** and  $2\cdot 3\text{H}_2\text{O}$ ; SAPR-8 = square antiprism, TDD-8 = triangular dodecahedron, BTR-8 = biaugmented trigonal prism.

| Atom | $1\cdot 5\text{H}_2\text{O}$ |       |        | <b>1</b> |       |        | $2\cdot 3\text{H}_2\text{O}$ |       |        |
|------|------------------------------|-------|--------|----------|-------|--------|------------------------------|-------|--------|
|      | SAPR-8                       | TDD-8 | BTPR-8 | SAPR-8   | TDD-8 | BTPR-8 | SAPR-8                       | TDD-8 | BTPR-8 |
| W1   | 0.546                        | 1.363 | 1.468  | 1.497    | 0.675 | 1.351  | 0.405                        | 1.542 | 1.505  |
| W2   |                              |       |        |          |       |        | 0.264                        | 1.722 | 1.647  |

**Table S2.** Continuous shape measure parameters for hexa-coordinated Cu centres of  $1\cdot 5\text{H}_2\text{O}$ , **1** and  $2\cdot 3\text{H}_2\text{O}$ ; OC- 6=octahedron.

| Atom | $1\cdot 5\text{H}_2\text{O}$ | <b>1</b> | $2\cdot 3\text{H}_2\text{O}$ |
|------|------------------------------|----------|------------------------------|
|      | OC-6                         | OC-6     | OC-6                         |
| Cu1  | 1.841                        | 1.679    | 1.448                        |
| Cu2  | 1.435                        | 1.218    | 1.631                        |
| Cu3  | -                            | -        | 1.388                        |
| Cu4  | -                            | -        | 0.985                        |

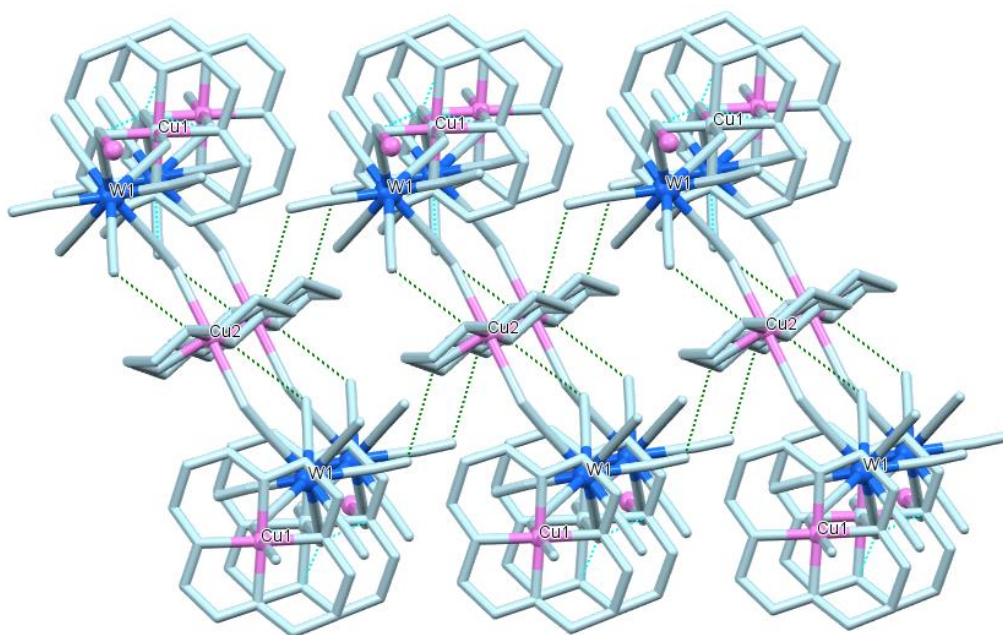

**Figure S4.** Inter- and intra-chain H-bonds in **1**.

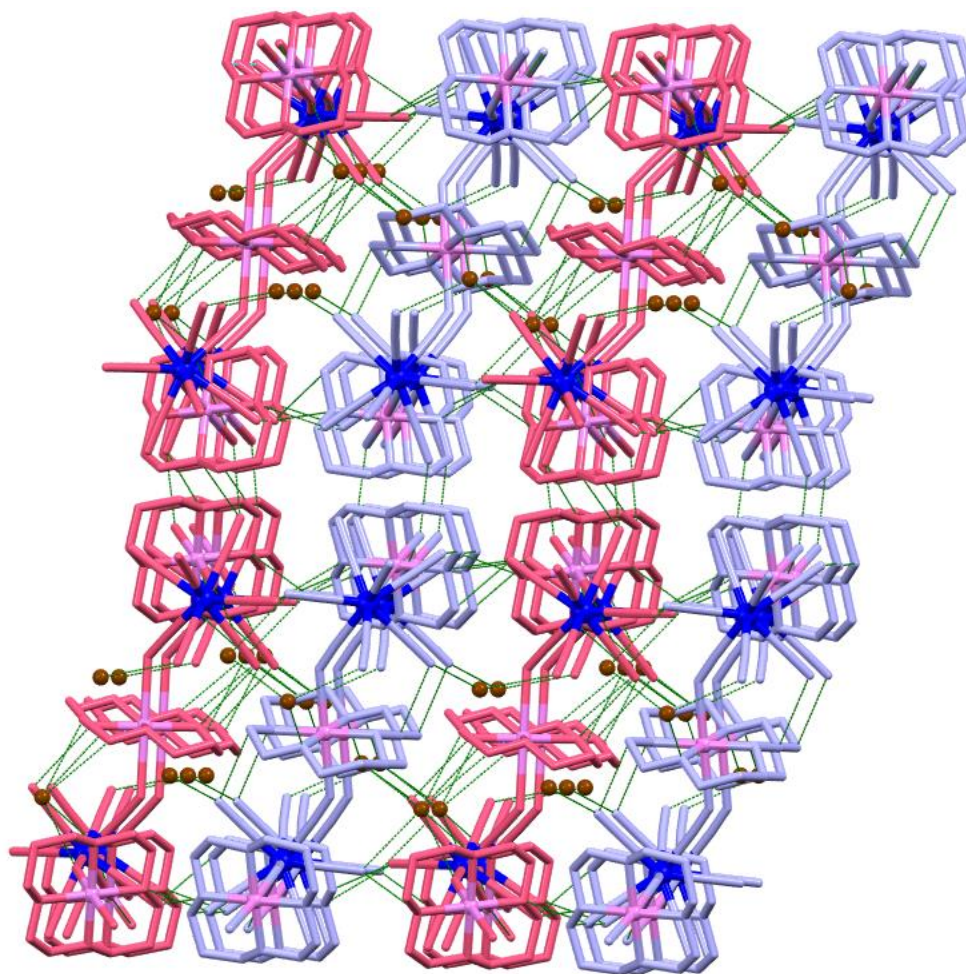

**Figure S5.** Inter- and intra-molecular H-bonds in **2·3H<sub>2</sub>O**; symmetrically independent molecules marked pink and violet.
